## **synder**: inferring genomic orthologs from synteny maps

Zebulun Arendsee<sup>1,2</sup>, Andrew Wilkey<sup>3</sup>, Urminder Singh<sup>1,2</sup>, Jing Li<sup>1,2</sup>, Manhoi Hur<sup>1,2</sup>, and Eve Syrkin Wurtele<sup>1,2\*</sup>

**1 Dept. of Genetics Development and Cell Biology, Iowa State University,  
Ames IA, 50010, USA**

**2 Center for Metabolic Biology, Iowa State University, Ames, IA 50011, USA**

**3 Dept. of Agronomy, Iowa State University, Ames, IA 50011, USA**

**\* To whom correspondence should be addressed**

### **1 Abstract**

2 Ortholog inference is a key step in understanding the evolution and function of a gene or  
3 other genomic feature. Yet often no similar sequence can be identified, or the true ortholog  
4 is hidden among false positives. A solution is to consider the sequence's genomic context.  
5 We present the generic program, **synder**, for tracing features of interest between genomes  
6 based on a synteny map. This approach narrows genomic search-space independently of  
7 the sequence of the feature of interest. We illustrate the utility of **synder** by finding  
8 orthologs for the *Arabidopsis thaliana* 13-member gene family of Nuclear Factor YC  
9 transcription factor across the Brassicaceae clade.

## 10 **1 Introduction**

11 A powerful first step in understanding the evolution and function of a genomic feature is  
12 resolving its genomic context, that is, comparing the feature to orthologous features in  
13 other species. Comparing multiple orthologous features across species allows evolutionary  
14 patterns to be uncovered. These patterns may include evidence of purifying selection, which  
15 implies the feature is important to the survival of the species; positive selection, implying  
16 the feature is rapidly evolving along one lineage; and functional dependencies between sites  
17 (for example, amino acids in an enzyme reaction site) [1]. These evolutionary trends have  
18 direct application in fields such as rational protein design [2]. Distinguishing between  
19 orthologs (homologous features arising through speciation) and paralogs (homologous  
20 features arising through gene duplication) is foundational to understanding the history of a  
21 feature. Genomic context is also critical for discerning the origins of the often large  
22 numbers of species-specific “orphan” genes that are found in most genome projects [3–6].

23 Identifying orthologs is not easy. A simple sequence similarity search of a query feature  
24 (e.g., a gene, transposon, miRNA, or any sequence interval) against a genome or proteome  
25 of a target species may obtain thousands of hits in a swooping continuum; these could  
26 include: the true ortholog, related family members (paralogs), and non-specific hits.  
27 Therefore, methods for winnowing the search results have been developed to identify the  
28 true orthologs. A straightforward approach to identify orthologs of protein-coding genes is  
29 reciprocal best hits [7]. In this technique, a protein encoded by a gene from the focal species  
30 is searched (e.g. with BLAST) against the target proteome. The highest scoring gene is  
31 then searched back against the proteome of the focal species. If the top scoring hit of the  
32 second search is the original query gene, then the two genes are accepted as orthologs.  
33 There are also methods that build on reciprocal best hits, such as the reciprocal smallest  
34 distance method that considers evolutionary distance in addition to similarity score [8].

35 Little or no significant sequence similarity is expected across species for some classes of

36 features. A lack of significant similarity may stem from sequences being very short (e.g., a  
37 single promoter element or an miRNA) or it could result from very rapid mutation rates in  
38 the feature (e.g., intragenic intervals that are under little or no purifying selection).

39 Orphan genes, which by definition have no protein homolog in related species, are an  
40 example of a feature for which sequence comparisons alone cannot delineate the region in  
41 the target genome from which the orphan gene arose [4]. These genes are often both short  
42 *and* rapidly evolving, making it very difficult to find orthologous genomic regions (possibly  
43 non-coding) even in closely-related target species. Without an ability to identify  
44 orthologous genomic intervals, the pathway of evolution of an orphan cannot be  
45 determined; for example, orphans of *de novo* origin cannot be distinguished from those  
46 orphans that stem from rapid mutation [3].

47 Purely sequence-based methods are also problematic if the true ortholog of a query gene  
48 is duplicated in the target species. In this case, the target species contains two genes that  
49 are true orthologs of the query gene. The co-evolution of duplicate genes relative to their  
50 singleton ortholog, is of interest in theoretical evolution [9]. One of the copies may rapidly  
51 evolve to gain a new function or it may become a pseudogene [10]. In either case, the  
52 reciprocal best hits method would find only the conserved copy.

53 A different approach to ortholog identification, one which does not depend on the  
54 genome-wide sequence similarity of the query features themselves and that does handles  
55 duplication events, is to consider the genomic context of the query, i.e., synteny [11].  
56 Genomic synteny is the conservation of the order of genomic features between two  
57 genomes [12].

58 The most obvious approach to a context-based search is to include the flanking regions  
59 of a query feature of interest when searching for an ortholog in the target genome. This  
60 approach is used by MicroSyn [13] for finding orthologs of features, such as miRNAs, that  
61 are too short and numerous to be easily searched by their sequence alone. While this

62 approach works well for an individual query feature, extending it to a high-throughput  
63 analysis is problematic, since no single cutoff for flank length will work well for all cases.  
64 For instance, a sequence residing within a highly repetitive centromere might require flanks  
65 of megabases.

66 An alternative to looking at the flanking sequence of each query feature individually is  
67 to reference a genome-wide synteny map. Rather than searching for the feature directly,  
68 orthologs of flanking syntenic regions (blocks) can be identified, and a potential ortholog of  
69 the query feature can be identified in the target genome by searching within the syntenic  
70 region. This strategy has been applied to study the genomic origin of orphan genes [14]  
71 (and the method refined in [15]) where a map of one-to-one orthologous genes was used to  
72 infer the orthologous genomic intervals where the non-genic sequence corresponding to the  
73 orphan genes is expected to reside. The one-to-one map made the computational problem  
74 very easy, and could effectively identify a sub-set of the genes of *de novo* origin, but the  
75 map was very coarse, especially in regions of low gene density, so no information is  
76 obtained for other orphan genes.

77 There are many programs designed to build synteny maps. Some programs build sparse  
78 synteny maps from given sets of orthologous genes (e.g., OrthoClusterDB [16]). Others  
79 perform full genome alignments. Of these, some focus on large scale (megabase range)  
80 syntenic blocks that are conserved across great evolutionary distances (e.g.,  
81 **DiagHunter** [17]), while others focus on micro-synteny, producing maps of many small  
82 syntenic blocks that capture local inversions, duplications and deletions (e.g., **BLASTZ** [18],  
83 **MUMmer4** [19], and **Satsuma** [20]). These micro-synteny programs are of greatest interest in  
84 this paper.

85 The diverse synteny mapping tools, though highly variable in granularity and  
86 accuracy [11,21], provide powerful approaches to enable the study of comparative genome  
87 evolution [12,22–24] and to glean novel information about the origin of *de novo* orphan

88 genes [14, 15, 25–27]. However, the use of these maps as a tool for orthology has been  
89 generally limited to either manual inspection, or to considering only those query features  
90 that overlap syntenic blocks.

91 `synder` is designed to infer orthologous regions in the target genome, even when the  
92 orthologs are *between* syntenic blocks, and to assess the quality of the inferences. To do  
93 this, it traces query features from a focal genome to a target genome using a whole-genome  
94 map. `synder` is a high-performance program with a core written in C++ and an R  
95 wrapper for integration into R workflows. It will work with any synteny map, but was  
96 designed for fine-grain micro-synteny maps that capture local inversions and transpositions.  
97 It assembles collinear sets of syntenic blocks from the map and uses them to infer tight  
98 search intervals for each query on the target genome, naturally handling duplication events  
99 and inversions. `synder` also provides detailed information about the quality of the search  
100 result. The only input required is a whole-genome synteny map and a set of features of  
101 interest in the focal genome. Thereby, `synder` automates the use of syntenic information to  
102 study orthologs across any pair of species with sufficiently conserved synteny.

## 103 **2 Algorithm**

104 The primary function of `synder` is to map a user-designated set of query features in the  
105 focal genome to a set of search intervals in a target genome (see **Table 1** for terminology  
106 and **Figure 1** for overview). To do this, `synder` contextualizes the query features based on  
107 a user-provided synteny map for the focal and target genomes. Query features of the focal  
108 genome are mapped to an associated synteny-based search interval on the target genome;  
109 this search interval delineates the region of the target genome where the query feature is  
110 predicted to be located.

111 **Algorithm 1** is an overview of the `synder`'s search algorithm. Each of the functions in

Table 1: Terminology

|                      |                                                                                                                                                                                                                    |
|----------------------|--------------------------------------------------------------------------------------------------------------------------------------------------------------------------------------------------------------------|
| focal genome:        | The genome that contains the query features.                                                                                                                                                                       |
| target genome:       | The genome in which search intervals are found for each feature of interest.                                                                                                                                       |
| query feature:       | The sequence interval delineating any feature of interest in the focal genome. This could be a protein-coding gene, an miRNA, an intron, a transposon, a nucleotide repeat, an lncRNA or any other genomic feature |
| blocks:              | Focal and target genome intervals that are inferred to be orthologs by an outside synteny program.                                                                                                                 |
| synteny map:         | A set of blocks for a pair of genomes.                                                                                                                                                                             |
| syntenic interval:   | A single interval on one side of a synteny map.                                                                                                                                                                    |
| adjacent intervals:  | Two syntenic intervals on the same scaffold with no syntenic interval located entirely between them.                                                                                                               |
| collinear blocks:    | Two blocks where both the focal and target syntenic intervals are adjacent and in the same orientation.                                                                                                            |
| collinear block set: | An ordered set of blocks where block $i$ is collinear to block $i + 1$ .                                                                                                                                           |
| query context:       | All blocks that overlap or are adjacent to the query interval.                                                                                                                                                     |
| search interval:     | An expected location of an ortholog of a query feature in the target genome.                                                                                                                                       |
| search space:        | The union of search intervals for a given query interval.                                                                                                                                                          |
| synteny score:       | A score for a syntenic block produced by the outside synteny program.                                                                                                                                              |
| synder score:        | A score for the relative reliability of a search interval (see <b>Figure 5</b> ).                                                                                                                                  |

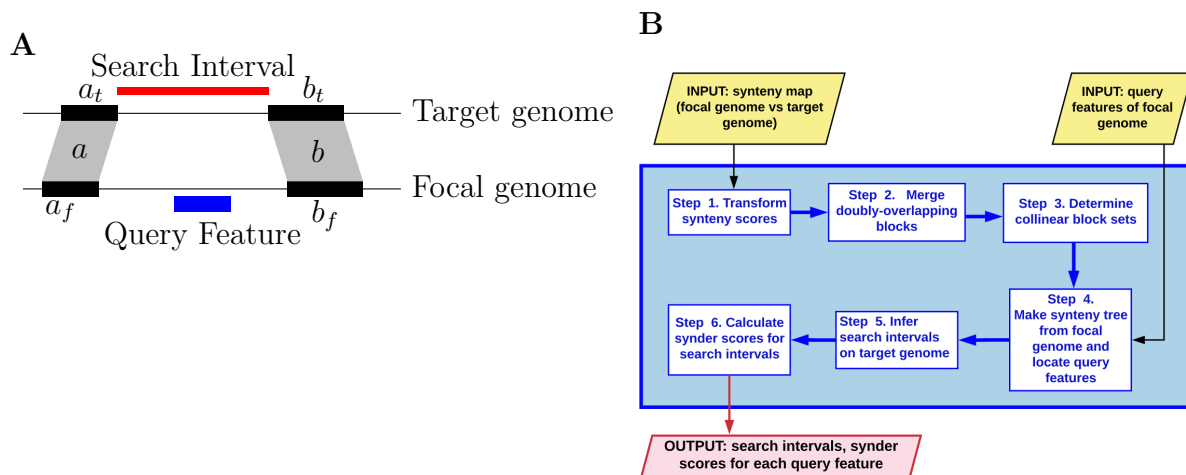

Figure 1: The **synder** algorithm identifies search intervals for query features based on synteny. **(A)** Diagram of a very simple syntenic relationship across focal and target genomes.  $a_f$ ,  $a_t$ ,  $b_f$ , and  $b_t$  are four syntenic intervals that comprise block  $a$  ( $a_f$ ,  $a_t$ ) and  $b$  ( $b_f$ ,  $b_t$ ). Blocks  $a$  and  $b$  are collinear and provide landmarks for associating the **query feature** in the focal genome with its **search interval** in the target genome. **(B)** Flow chart of the steps in the **synder** algorithm. **synder**: 1) transforms the synteny scores for each of the blocks in an input synteny map, such that scores are additive; 2) merges doubly-overlapping blocks; 3) assigns each block in the synteny map to exactly one collinear set of blocks; 4) finds the overlapping or nearest flanking syntenic intervals for each query feature in the focal genome (e.g.,  $a_f$  and  $b_f$  in **A**); 5) for each query feature (i.e. the interval corresponding to a feature of interest on the focal genome) finds all collinear block sets that contain at least one of the blocks that flank or overlap the query feature, and then relative to each of these collinear block sets, maps the query interval to a search interval in the target genome; and 6) calculates search interval scores for each query feature relative to the search interval of each collinear set. The final output provides the query features with their corresponding hits in the target genome and a composite score for each hit.

112 this algorithm is defined in detail in the subsequent sections.

```
1 function synderSearch( $\vec{q}$ ,  $M$ ,  $r$ ,  $k$ ,  $t$ ):
2    $\vec{s}$  = transformScores( $M$ ,  $t$ )
3    $M'$  = mergeOverlapping( $M$ ,  $\vec{s}$ )
4    $C$  = collinearSets( $M'$ ,  $k$ )
5    $T$  = buildTree( $M'$ )
6   foreach  $q$  in  $\vec{q}$  do
7      $\vec{a}$  = anchors( $q$ ,  $T$ )
8      $\vec{c}$  = searchSets( $\vec{a}$ ,  $C$ )
9     foreach  $c$  in  $\vec{c}$  do
10      ( $i$ ,  $b$ ) = searchInterval( $q$ ,  $c$ )
11       $s$  = score( $q$ ,  $c$ ,  $r$ )
12      recordRow( $q$ ,  $i$ ,  $s$ ,  $b$ )
13    end
14  end
```

**Algorithm 1:** A high-level overview of the core **synder** search algorithm.  $\vec{q}$ , list of query features;  $M$ , synteny map;  $r$ , search interval score decay rate (see **Figure 5**);  $k$ , number of interrupting blocks that is tolerated;  $t$ , type of synteny score;  $\vec{s}$ , vector of transformed, additive scores used in assigning final scores to each search interval. **synder** transforms scores and merges overlapping blocks to yield a processed, reduced synteny map,  $M'$ . Sequential syntenic blocks,  $C$ , are determined from  $M'$ .  $T$ , the interval tree data structure, is then used to find the syntenic context (i.e., the anchors,  $\vec{a}$ ) on the focal genome for each query feature,  $q$ . Next, query features are mapped to one or more collinear set of blocks,  $\vec{c}$ . For each block, the associated search interval,  $i$ , is identified and the type of boundary,  $b$ , is determined. Each search interval is given a **synder** score,  $s$ . Finally, each search interval is recorded in the output table as a single row including the query feature ( $q$ ), search interval ( $i$ ), synder score ( $s$ ), and search interval type ( $b$ ).

## 113 2.1 Input Synteny Map

114 The primary raw input to **synder** is a synteny map that is provided as a table where each  
115 row describes one block. Each block consists of: an interval in the focal genome; an  
116 inferred syntenic interval in the target genome; a synteny score representing some metric of  
117 the confidence that the pair of intervals is orthologous; and, the relative orientation of the  
118 intervals. The focal and target intervals are each described by a chromosome/scaffold name  
119 and a start and stop position. The synteny score for each block is some measure of



120 quality/certainty (e.g., percent identity or p-value) that is specific to the tool that used to  
121 generate the map. The orientation of the block is the strand in the target genome relative  
122 to the query, with '+' indicating the same strand and '-' indicating the inversion.

## 123 **2.2 Step 1. Transform synteny scores**

124 The synteny scores for the blocks in a synteny map may be expressed in a variety of ways  
125 by the various synteny programs. Strong similarity may be represented by low numbers  
126 (e.g., if scores are e-values) or high numbers (e.g., if scores are bitscores). Scores may be  
127 additive (e.g., bitscores) or averaged (e.g., percent similarity). The user must specify the  
128 type of the input synteny scores. Internally, the `synder` algorithm transforms these scores  
129 so that they are additive. More specifically, `synder` assumes  $S(a + b) = S(a) + S(b)$ , that  
130 is, if the blocks  $a$  and  $b$  are concatenated, then the synteny score should be equal to the  
131 sums of the scores for blocks  $a$  and  $b$ . `synder` transforms the synteny map scores to an  
132 additive score using one of the transforms below:

$$\text{transformScore}(s, l) = \begin{cases} \text{score density} & l * s \\ \text{percent identity} & l * s / 100 \\ \text{e-value or p-value} & -\log(s) \\ \text{otherwise} & s \end{cases} \quad (1)$$

133

134 Where  $s$  is the input synteny score and  $l$  is the interval length. `synder` transforms the  
135 scores when it loads a synteny file, updates them as needed in Step 2, and ultimately uses  
136 them in Step 6 to generate scores for the final search intervals.

## 137 **2.3 Step 2. Merge doubly-overlapping blocks**

138 In a “perfect” synteny map, blocks would not overlap on both the focal and target sides. In  
139 practice, however, synteny algorithms occasionally produce overlapping blocks. These cases  
140 would produce multiple collinear block sets that have the same orientation and cover the  
141 same region. To avoid this, **synder** merges any blocks that overlap on both the focal and  
142 target sides. The interval of the merged blocks is the union of the overlapping block  
143 intervals. The **synder** score of the merged blocks is calculated by summing the  
144 non-overlapping interval scores with the maximum of the overlapping intervals:

$$S_{ab} = d_a(l_{a_f} - l_o) + d_b(l_{b_f} - l_o) + l_o \max(d_a, d_b) \quad (2)$$

145 Where  $d_a$  and  $d_b$  are the score densities of blocks  $a$  and  $b$  (density is the synteny score for a  
146 block divided by the length of the syntenic interval on the focal genome); and where  $l_{a_f}$ ,  $l_{b_f}$   
147 and  $l_o$  are the lengths of  $a$ ,  $b$ , and their overlap, respectively.

148 A potential downside of this approach is that, when more than two intervals are  
149 doubly-overlapping, the order in which the scores are merged matters, with blocks merged  
150 later having a stronger influence. A second issue is that the merged score is calculated  
151 based on the intervals on just one side of the synteny map. The length of each interval, and  
152 the length of the overlap between the intervals, may vary between the two sides of the  
153 synteny map. For now, we do not address either of these issues, since doing so would  
154 complicate the algorithm and probably have little effect on any biological dataset (since  
155 doubly-overlapping intervals are uncommon).

156 The output of Step 2 is a processed synteny map without doubly-overlapping blocks.

## 157 **2.4 Step 3. Determine collinear block sets**

158 **synder** assigns each block in a synteny map to exactly one set of collinear syntenic blocks

159 **(Figure 2)**. Each collinear block set consists of adjacent blocks that are ordered on the  
160 query and target sides. **synder** considers two syntenic intervals “adjacent” if they are on  
161 the same scaffold and no syntenic interval is contained entirely between them. Adjacency  
162 on the target-side further requires that the intervals have the same orientation (+/-)  
163 relative to the focal genome. Two blocks are collinear if the syntenic intervals on the  
164 focal-genome and target-genome are adjacent. The collinear block sets may be inverted  
165 and/or may overlap other collinear block sets on either the focal or target side (e.g., for  
166 duplicated sequences). The individual blocks that make up the collinear set are used in  
167 Steps 4 and 5 to delimit the search intervals on the target genome relative to each query  
168 feature of the focal genome.

169 This approach can be overly strict, resulting in many small collinear block sets. Tracing  
170 blocks across whole genome duplication, and subsequent genome alterations [28], is  
171 particularly challenging, since intervals in the homologous chromosomes could randomly  
172 diverge, resulting in a synteny map that alternates between mapping to one chromosome  
173 and the homologous chromosome. This is especially problematic in plants, where whole  
174 genome duplications are common [29]. To reduce this potential complication, **synder**  
175 provides the user an option to relax the adjacency restriction by allowing  $k$  syntenic  
176 intervals that map to alternative target scaffolds to interrupt a pair of query-side intervals  
177 in a collinear set.

178 The output of Step 3 is the set of blocks that are non-overlapping and adjacent. Each  
179 block is assigned to exactly one collinear block set.

## 180 **2.5 Step 4: Find the contextual anchors on the focal genome for** 181 **each query feature**

182 The next step is to find the blocks that contain, overlap, or are adjacent to each query  
183 feature on the focal genome. These blocks will provide “anchors” that will be used in

184 Step 5 to map the query feature to one or more collinear sets of blocks in the target  
 185 genome and hence to identify the search interval(s) in the target species.

186 The user provides the query features as a Gene Feature Format (GFF) file that  
 187 describes the genomic intervals on the focal genome corresponding to the query features of  
 188 interest. A modification is to provide the GFF file along with BLAST or other  
 189 whole-genome similarity scores; this modification was used as input for the case study on  
 190 the NF-YC gene family (see RESULTS section).

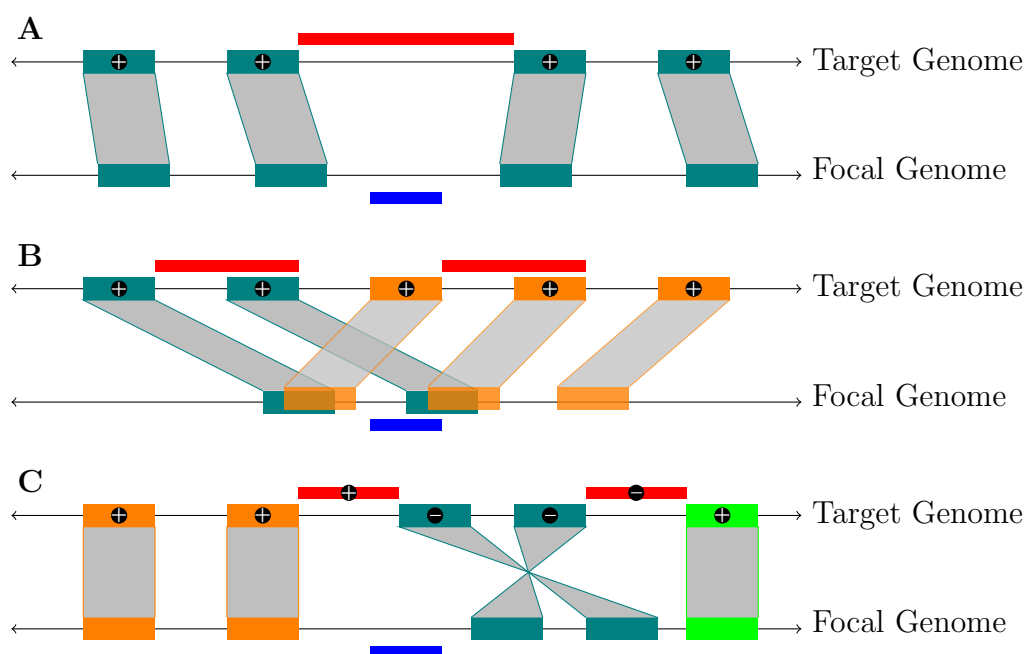

Figure 2: Collinear block set construction with focal-genome “anchors” to infer search intervals on the target genome. The **blue bars** below each focal genome are the query features. Genome-wide collinear block sets (colored orange, teal or green) are identified in Step 3, and are used to identify the focal-side anchors for each query feature in Step 4. The **red bars** above the target genome are the search intervals inferred by **synder** in Step 5. **(A)** a simple case where the query feature does not overlap a syntenic interval and is bound between syntenic intervals in a collinear set of blocks. **(B)** a tandem duplication where **synder** resolves the blocks into two collinear block sets (teal and orange) and infers search intervals for each. **(C)** a query feature that is **unbound** on each side (see **Figure 4**) resulting in one search interval relative to the orange collinear block set (red bar on left) and one search interval relative to the inverted teal block collinear set (red bar on right). (+/-) signs in the target search intervals represent their strand orientation relative to the query (‘-’ is an inversion).

191 **synder** uses a modified interval tree algorithm to locate the syntenic intervals on the  
192 focal genome that “anchor” the query feature. Building the interval tree is an  $O(n \log(n))$   
193 operation (see **Algorithm 2**) and searching for a given interval is  $O(\log(n) + m)$ , where  $m$   
194 is the number of overlapping intervals returned and  $n$  is the size of the synteny map (see  
195 **Algorithm 3**). We modified an algorithm that returns only directly overlapping  
196 intervals [30], to enable **synder** to find the flanking intervals (upstream and downstream  
197 intervals) when no overlapping intervals are found (see **Figure 3**).

```
1 function buildTree( $\vec{q}$ ):  
2   if length( $\vec{q}$ ) == 0 then  
3     | return Null  
4   end  
5    $c$  = midpoint( $\vec{q}$ )  
6    $\vec{v}_{left}$  = filter( $\vec{q}$ ,  $\lambda q \rightarrow c < q_1$ )  
7    $\vec{v}_{mid}$  = filter( $\vec{q}$ ,  $\lambda q \rightarrow q_1 \leq c \leq q_2$ )  
8    $\vec{v}_{right}$  = filter( $\vec{q}$ ,  $\lambda q \rightarrow q_1 < c$ )  
9    $T_{left}$  = buildTree( $\vec{v}_{left}$ )  
10   $T_{right}$  = buildTree( $\vec{v}_{right}$ )  
11  return Tree( $c$ ,  $\vec{v}_{mid}$ ,  $T_{left}$ ,  $T_{right}$ )
```

**Algorithm 2:** Build a syntenic interval tree. **buildTree** takes a vector of intervals,  $\vec{q}$ , on a given scaffold/chromosome of the focal genome and returns an interval tree data structure. The midpoint  $c$  is an integer equal to the middle position in the interval in the middle of the vector of intervals (by index). If the input vector is sorted, then the midpoint will tend to be near the center of the scaffold. **filter**( $\vec{q}, f$ ) selects the subset of intervals in  $\vec{q}$  for which the condition  $f(q)$  is true. The filters in lines 6-8 partition each element in  $\vec{q}$  into one of three sets: intervals on the left of the midpoint  $c$ , intervals overlapping the midpoint  $c$ , and intervals on the right of the midpoint  $c$ . New trees are created recursively for the left (less than) and right (greater than) sets of intervals. **buildTree** returns a new syntenic interval Tree object, ( $T$ ), that stores the midpoint  $c$ , all overlapping syntenic intervals ( $\vec{v}_{mid}$ ), and the left and right child trees. The Tree will be used in **Algorithm 3** to identify the anchors for each query feature.

```

1 function search( $T, t, q$ ):
2   if  $t = \text{Null}$  then
3     | return Empty
4   end
5    $\vec{r} = []$ 
6   if  $t_{\text{midpoint}} < q_1$  then
7     | foreach  $i$  in stopSorted( $t$ ) do
8       |   if  $q_1 \leq i_2$  then
9         |     |  $\vec{r}.\text{add}(i)$ 
10        |   end
11       | end
12       | if  $t_{\text{right}} = \text{Null}$  and  $\text{length}(r) = 0$  then
13         |   |  $\vec{r}.\text{add}(\text{opposite}(T, t))$ 
14         |   end
15         |  $\vec{r}.\text{add}(\text{search}(T, t_{\text{right}}, q))$ 
16       | end
17       | else if  $t_{\text{midpoint}} > q_2$  then
18         |   | foreach  $i$  in startSorted( $t$ ) do
19           |     | if  $q_2 \geq i_1$  then
20             |       |  $\vec{r}.\text{add}(i)$ 
21             |       | end
22           |     | end
23           |     | if  $t_{\text{left}} = \text{Null}$  and  $\text{length}(r) = 0$  then
24             |       |  $\vec{r}.\text{add}(\text{opposite}(T, t))$ 
25             |       | end
26           |     |  $\vec{r}.\text{add}(\text{search}(T, t_{\text{left}}, q))$ 
27         |   | end
28         |   | else
29           |     | foreach  $i$  in startSorted( $t$ ) do
30             |       |  $\vec{r}.\text{add}(i)$ 
31             |       | end
32           |     |  $\vec{r}.\text{add}(\text{search}(T, t_{\text{left}}, q))$ 
33           |     |  $\vec{r}.\text{add}(\text{search}(T, t_{\text{right}}, q))$ 
34         |   | end
35       | return  $\vec{r}$ 

```

**Algorithm 3:** Given the input of a syntenic interval tree ( $T$ ), the current node in the tree ( $t$ ), and a query feature ( $q$ ), find all syntenic intervals in the focal genome that overlap the query feature.  $\vec{r}.\text{add}(\vec{x})$  means intervals  $\vec{x}$  are added to the search result  $\vec{r}$ .  $q_1$  and  $q_2$  represent the left- and right-hand edges of the query feature.  $i$  is an interval in the interval tree.  $t_{\text{midpoint}}$  is the midpoint of the current node in the tree.  $t_{\text{left}}$  and  $t_{\text{right}}$  are the left- and right-hand subtrees. If no intervals are found, the `opposite` function returns the nearest blocks on each side of  $q$  (see **Figure 3**).

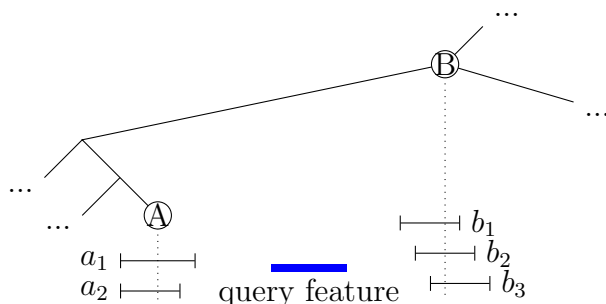

Figure 3: Identification of the syntenic intervals that anchor a query feature on the interval tree from the focal genome. *A* and *B* are nodes in the interval tree. *A* stores the overlapping syntenic intervals  $a_1$  and  $a_2$ . *B* stores the overlapping intervals  $b_1$ ,  $b_2$  and  $b_3$ . The query feature falls between the syntenic intervals stored in nodes *A* and *B*. The interval tree algorithm first makes the tree, and then finds the nearest node to the query. If the closest node found is *A*, and the nearest syntenic interval ( $a_1$ ) detected is on the left side of the query feature, then the algorithm will trace the tree until it finds the first node to the right of the query feature (i.e., node *B*). Conversely, if the closest node found is to the right of the query feature (node *B*), then the tree is traced one branch to the left, and then as many branches to the right as possible (i.e., until node *A* is found). In either case, all overlapping nodes in *A* and *B* are returned as the anchors for this query sequence.

## 198 2.6 Step 5. Map query features and infer search intervals on the 199 target genome

200 Each query feature is mapped to a search interval that is created with respect to each  
201 associated collinear block set (**Figure 2**). To do this, **synder** first classifies each edge of  
202 the query feature relative to its relationship to an associated collinear set of blocks (**Figure**  
203 **4**), where each query feature edge may fall: 1) between two collinear sets of blocks  
204 (**unbound**); 2) inside a block (**inblock**); 3) between blocks comprising a collinear block set  
205 (**bound**); or 4) beyond all blocks, i.e., near the beginning or end of the scaffold (**extreme**).  
206 **synder** sets each boundary of the target genome search interval to the nearest edge of a  
207 block in the collinear set if the edge is **inblock** or **bound**; to the nearest syntenic interval  
208 beyond the collinear set if the edge is **unbound**; or to the end of the scaffold if the edge is  
209 **extreme** (see **Figure 4**).

210 If a search interval is bound by two blocks,  $a$  and  $b$ , which define the two bounding

211 intervals,  $[a_1, a_2]$  and  $[b_1, b_2]$ , then the search interval be the inclusive interval  $[a_2, b_1]$ . We  
 212 use an inclusive interval, rather than the exclusive interval from  $(a_2 + 1)$  to  $(b_1 - 1)$ , to  
 213 avoid negative length intervals that would occur when  $b_1 = a_1 + 1$  (as would occur if there  
 214 is a deletion in the target genome).

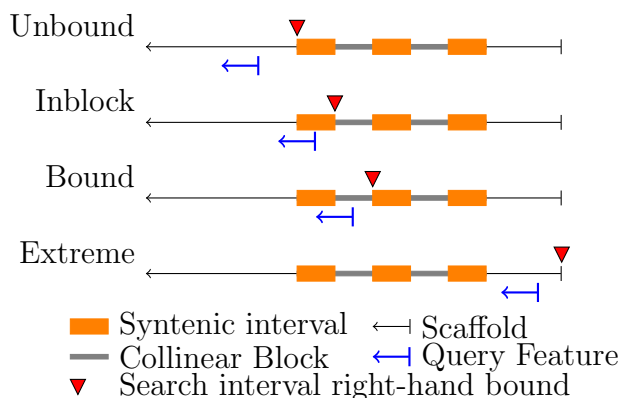

Figure 4: Snapping rules to define the location of the search interval edges on the target genome. 1) The left and right edges of the query feature are used to define the search interval relative to a given collinear block. Only the target genomes and the right edge of the query featured (represented by perpendicular line on query feature) are shown. 2) The right-hand edge of the search interval is then assigned (red triangles) (Rules are the same for the left edge). **Unbound**: the edge does not overlap the collinear block set. **Inblock**: the edge is inside a syntenic interval. **Bound**: the edge is between intervals in a collinear block set. **Extreme**: the edge is beyond any syntenic interval (near end of scaffold).

## 215 2.7 Step 6. Calculate scores for each collinear set relative to 216 each overlapping query feature

217 **synder** calculates the *synder score* for each input query feature relative to each associated  
 218 collinear block set (**Figure 5**). The score reflects the intuitive ideas that: 1) query features  
 219 are more reliable if a greater proportion of their sequence overlaps blocks in a collinear set;  
 220 and, 2) query features are more reliable if they are within collinear block sets that are  
 221 densely packed. In cases where many possible search intervals are identified for a given  
 222 query feature, the *synder scores* can be used to compare the relative quality of the search



223 intervals. The **synder** score is especially important when  $k$  (the number of interrupting  
224 blocks that is tolerated) is high, since a large  $k$  allows large gaps between blocks in the  
225 collinear block sets. The pseudocode for **synder**'s scoring algorithm is shown in  
226 **Algorithm 4**. Note that input scores for syntenic blocks have been transformed to be  
227 additive (**Equation 2.2** (Step 1)).

```
1 function score( $q, \vec{b}, r$ ):  
2    $s = 0$   
3   foreach  $b$  in  $\vec{b}$  do  
4      $o = \text{overlap}(q, b)$   
5      $d = b_{score} / (b_2 - b_1 + 1)$   
6      $s += d * (o_2 - o_1 + 1)$   
7     if  $b_1 < q_1$  then  
8        $s += d \int_{q_1 - b_1}^{\max(0, q_1 - b_2)} e^{rx} dx$   
9     end  
10    if  $b_2 > q_2$  then  
11       $s += d \int_{b_2 - q_2}^{\max(0, b_1 - q_2)} e^{rx} dx$   
12    end  
13  end  
14  return  $s$ 
```

**Algorithm 4:** Calculating the *synder score* ( $s$ ) for a query feature and the set of collinear blocks from the target genome to which it is anchored.  $q$  is the query feature,  $b$  is a focal genome-side syntenic interval within collinear block set  $\vec{b}$ , and  $o$  is the intersection (of zero length or greater) between  $q$  and  $b$ . The start and end points (edges) of the query feature  $q$  are  $q_1$  and  $q_2$  (as for edges of  $b$  and  $o$ ).  $b_{score}$  is the synteny score associated with syntenic interval  $b$ .  $r$  is an adjustable parameter, the decay rate.

228 In **Algorithm 4**, each block in the collinear block set can contribute to the total *synder*  
229 score (**Figure 5**). The score decay rate is controlled by the adjustable parameter  $r$ . For  
230 the default settings, the weight of the scores of blocks that neither overlap nor partially  
231 overlap the query feature decays exponentially with the absolute distance from the nearest  
232 query feature bound on the focal side. If the user sets  $r$  to be a low positive number, the  
233 weight at a given position will fall slowly with distance from the query interval (e.g., when  
234  $r = 0.001$  the weight will fall by half by 1000 bases from the nearest query feature bound);

235 thus, all blocks in the collinear set will contribute to the score, but they matter less with  
236 distance (**Figure 5**,  $r > 0$ ).  $r = 0$  would give equal weight to all blocks in the collinear set,  
237 in that case, the density of the map will not affect the score, and the score would simply be  
238 equal to the sums of the total scores for all the syntenic blocks. A high value, such as  
239  $r = 100$ , would completely ignore genomic context, basing the query feature score only on  
240 the portions of syntenic blocks that overlap the query feature. With this  $r$  setting, the  
241 **synder** score would be 0 if the query feature does not overlap any syntenic block.

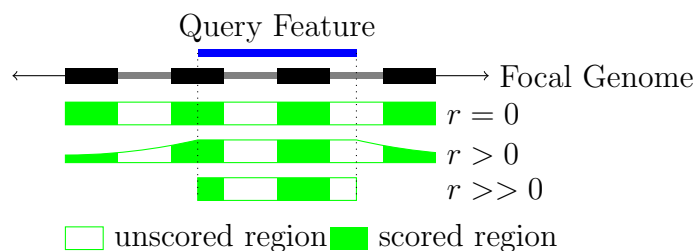

Figure 5: Calculation of synder score for a query feature relative to a collinear block set. **Black bars:** the collinear set of syntenic blocks that anchor the focal genome to the target genomes. (Only depicted on focal genome.) The total score of the search interval is the sum of the scores for each block. The score for each block, relative to the query feature (blue bar), is equal to the synteny score for the block times the “weight” of the block (determined by the adjustable parameter,  $r$ ). Three values for  $r$  are depicted. The weight of each block is the area represented by the **solid green**. The intervals between blocks (**empty green**) do not contribute to the score.

### 242 3 RESULTS AND DISCUSSION

243 Mapping genes in a gene family in one species to their orthologs in a related species is a  
244 major usage case for **synder**. To demonstrate the use of **synder**, we identify orthologs of  
245 the *A. thaliana* NF-YC family genes across several species in Brassicaceae (**Figure 6**).

246 The canonical NF-Y is a heterotrimeric, eukaryotic transcription factor that is  
247 comprised of subunits NF-YA, NF-YB and NF-YC [31]. NF-Y has been associated with  
248 characteristics as diverse as cell division [32], cancer [33, 34], drought tolerance [35], broad

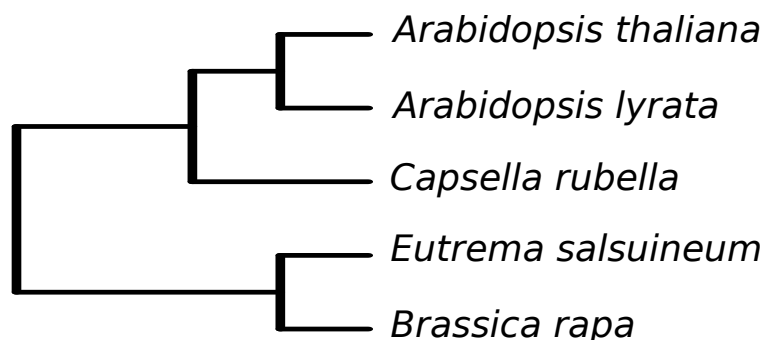

Figure 6: The species tree of the Brassicaceae used in this study. *A. thaliana* is the focal species.

249 spectrum disease resistance [36], and carbon and nitrogen partitioning [37]. In animals and  
250 fungi, a single gene encodes each of the three NF-Y subunits. In contrast, the NF-Y  
251 subunits in plants are each encoded by gene families of 10-15 genes [34, 38, 39]. The  
252 combinatorial complexity of the potential plant NF-Y complexes that could be formed  
253 from the three NF-Y subunits has obfuscated the role of each individual family member,  
254 although progress is being made. For example, NF-YA1 of alfalfa controls successful  
255 symbiosis between rhizobia and plant, and is required for the persistence of the nodule  
256 meristem [40, 41].

257 Compounding the complexity of the action of NF-Y subunits in the canonical  
258 heterotrimer, specific family members of at least two of the subunits, NF-YC and NF-YB,  
259 can also form associations with a variety of other nuclear proteins [37, 42, 43]. One of three  
260 NF-YC proteins can interact with one of two NF-YB proteins to enable  
261 CONSTANS-promoted photoperiod-induced flowering [44, 45]. NF-YC4 of *A. thaliana*  
262 interacts with the protein of the orphan gene QQS to modulate carbon and nitrogen  
263 partitioning [37]. Several NF-YC family members interact with histone deacetylase 15  
264 (HDA15) in the light to reduce histone acetylation, which in turn decreases hypocotyl  
265 elongation [42].

266 Clear determination of NF-YC orthologs across species would permit the assessment of

267 the relationships among orthology and function in evolution of this gene family. In practice,  
268 ortholog identification is often based only on sequence similarity scores. The highest scoring  
269 match, however, may not be the true ortholog. `synder` allows more reliable ortholog  
270 inference by finding the similarity matches that overlap the inferred syntenic regions. In  
271 this way, `synder` may serve as a syntenic filter downstream of the similarity search.

### 272 **3.1 NF-YC orthologs: *Arabidopsis thaliana* compared to** 273 ***Arabidopsis lyrata***

274 The specific case of determining the *A. thaliana* NF-YC orthologs in its sister species,  
275 *A. lyrata*, illustrates the use of `synder` in resolving orthologs. Since NF-Y is a large family,  
276 the paralogous NF-YC family members must be distinguished from the true orthologs.

277 The genomic relationship between the two species further challenges analysis. While the  
278 species diverged only about 8.8 million years ago [46], *A. lyrata* has undergone a whole  
279 genome duplication since splitting from the common ancestor it shares with *A. thaliana*.  
280 This complicates orthology inference, since each *A. thaliana* gene is expected to have two  
281 orthologs in *A. lyrata*. Only one of each duplicate *A. lyrata* ortholog may have preserved a  
282 function. Its sister ortholog may have been deleted or become a pseudogene through  
283 genome fractionation [28, 47]. Alternatively, a sister ortholog may have undergone selection  
284 for a completely new molecular function [48, 49]. A third possibility is that the molecular  
285 function of each sister ortholog was preserved through the neutral process of  
286 subfunctionalization [48].

287 In this analysis, we built a synteny map with Satsuma [20] using default parameters that  
288 yielded 229,562 syntenic blocks with a median length of 163 nt (1st quantile = 33 bases,  
289 3rd quantile = 365 bases). This is a very dense map: the *A. thaliana* genome is about  
290 120M in length, thus there are an average of around 1900 syntenic blocks per megabase.

291 A `synder` search mapped 12 of the 13 query NF-YC family member genes to a search

292 interval in *A. lyrata* that also contained the top BLAST hit (see Hits worksheet in  
293 supplementary) (**Figure 7**). Further, **synder** uniquely mapped 11 of the 13 query genes to  
294 a single *A. lyrata* gene. NF-YC5 and NF-YC10 are mapped by **synder** to two genes in  
295 *A. lyrata*, potentially reflecting that the genome duplication of *A. lyrata* was syntenically  
296 conserved. In contrast, a BLAST search yielded a nearly fully connected graph between  
297 NF-YC members in the two species. In the case of NF-YC8, **synder** identified orthologs  
298 that were located in the same syntenic region of the two genomes; however, the whole  
299 genome BLAST did not identify these likely orthologs, but rather other sequences were  
300 among the top hits. **synder** and BLAST identified the same gene as having the highest  
301 score. A second NF-YC12 ortholog was identified by **synder** that was not selected by  
302 BLAST.

303 If each pair of orthologs in *A. lyrata* had undergone only minimal sequence divergence  
304 and if synteny was maintained in each case, a **synder** analysis might uniquely identify two  
305 *A. lyrata* orthologs for each of the 13 NF-YCs of *A. thaliana*. Indeed, **synder** identified two  
306 hits for three of the family member: NF-YC5, NF-YC10 and NF-YC12. The BLAST  
307 results cannot reveal whether the second top BLAST hit is an ortholog or not.

### 308 **3.2 NF-YC orthologs across the Brassicaceae family**

309 This approach can be easily extended across the Brassicaceae family. We consider the  
310 species in **Figure 6**. In each species, tBLASTn alone links each NF-YC gene to nearly all  
311 of the other NF-YC genes; in contrast, **synder** identifies unique mappings to orthologs,  
312 many of which differ from the highest BLAST hit. As syntenic distance increases, the  
313 orthologs become more difficult to identify through syntenic methods (**Figure 7**).  
314 However, for those genes located in syntenically-conserved regions, **synder** would more  
315 reliably identify the ortholog. For example, in *B. rapa*, **synder** identifies an NF-YC  
316 ortholog within the syntenic search space for NF-YC3, NF-YC5, NF-YC7, and NF-YC8

317 that does not correspond to the top BLAST hit (**Figure 7**). `synder` identified a syntenic  
318 ortholog of NF-YC6 that is only a weak BLAST hit. For NF-YC2, the ortholog identified  
319 by `synder` is not annotated at all in *B. rapa*. It may or may not be an expressed gene, but  
320 it is most likely an ortholog. Thus, `synder` can be used to augment whole-genome  
321 similarity inferences with syntenic context information.

## 322 4 CONCLUSION

323 `synder` provides a flexible, reproducible method to track specific genetic events. It also  
324 provides a pathway to evaluate broad biological concepts, including the evolution and  
325 diversification of gene families; the predominant mechanisms of diversification across  
326 lineages of eukaryotes and prokaryotes; the effects of genome duplication; and the  
327 relationship of different features to genomic instability. These types of analyses can  
328 ultimately reveal those genetic events that might be associated with particular evolutionary  
329 consequences, such as rapid evolution, horizontal transfer, *de novo* emergence of genes,  
330 transposition, or duplication.

## 331 5 IMPLEMENTATION

332 `synder` is a C++ program wrapped in an R package via Rcpp [50]. It is designed to be  
333 compatible with Bioconductor, an R-based bioinformatics ecosystem [51].

## 334 6 AVAILABILITY

335 As an R package, `synder` should work on any system. It is distributed under a GPL-3 open  
336 source license and the source code is available at <https://github.com/arendsee/synder>.  
337 All code required to run the case study is available at

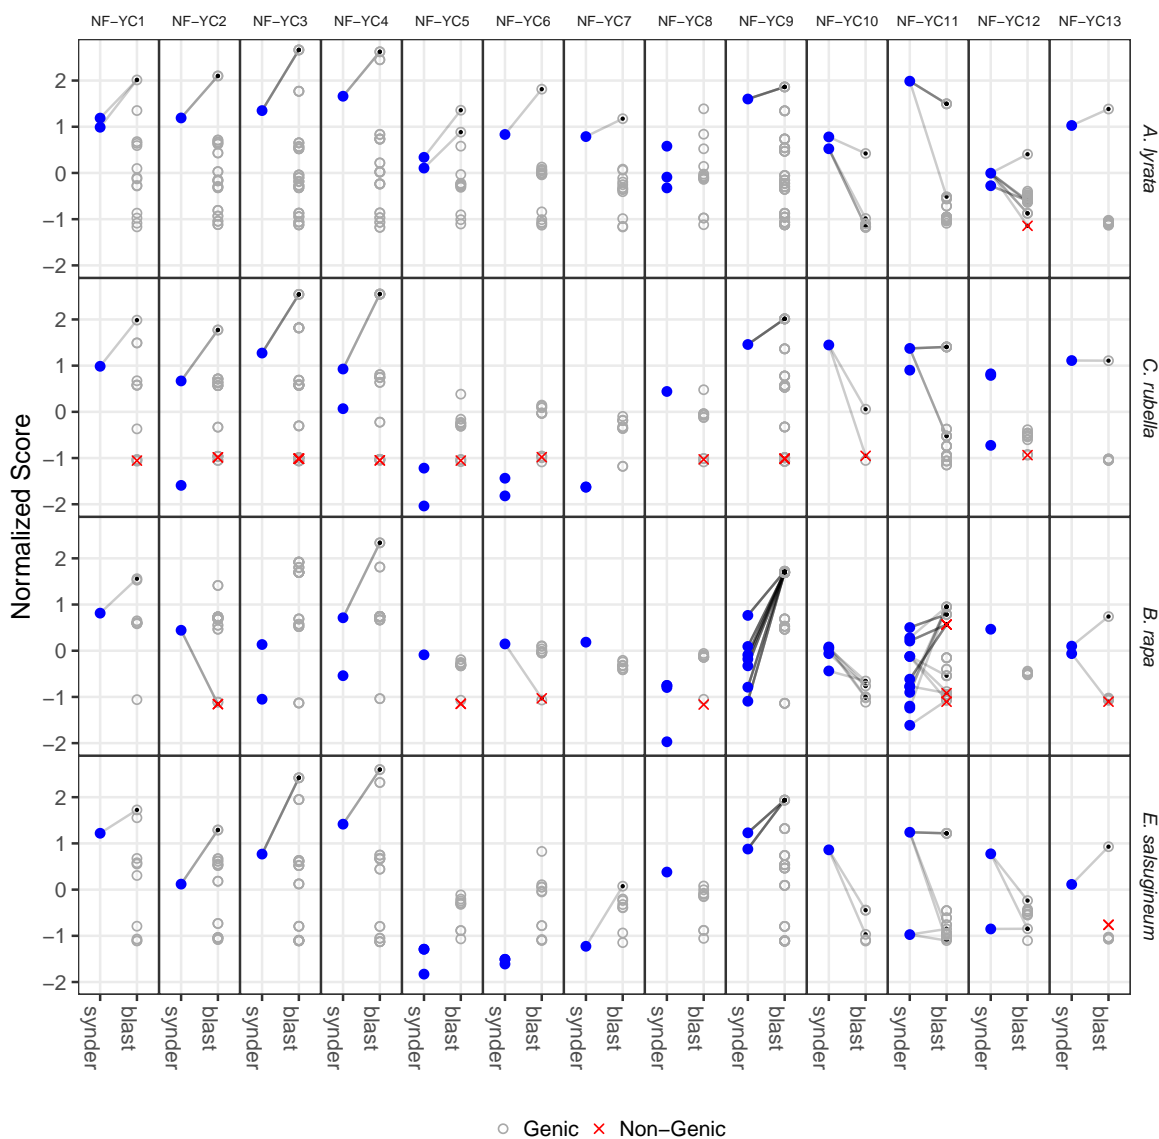

Figure 7: Comparison of orthologs inferred by **synder** and BLAST for the 13 *A. thaliana* NF-YC family members across genomes of four target species from Brassicaceae. Each row represents predicted orthologs in a target species. The x-axis for each box compares **synder** and tBLASTn scores. **Blue dots**, search intervals on the target genome that overlap a gene; **gray circles**, tBLASTn hits ( $E\text{-value} < 0.001$ ) on the target genome; **red X's**, tBLASTn hits on the target genome that do *not* overlap any annotated gene. The normalized Score (y-axis) is the score for **synder** search intervals and tBLASTn hits; **synder** scores were logged, and tBLASTn E-values were transformed with a negated, base10 log. Values were normalized by subtracting the means and dividing by the standard deviation. **Gray lines**, overlap between the tBLASTn hit interval and the **synder** search interval, i.e., tBLASTn finds a hit on the expected strand within the synder-inferred search interval.

338 <https://github.com/arendsee/synder-case-study> and the required input data is on  
339 DataHub at <https://datahub.io/arendsee/synder-nfyc>.

## 340 **7 ACKNOWLEDGEMENTS**

341 We thank Steven Cannon and Jennifer Chang for discussion and proof-reading.

## 342 **8 AUTHORS' CONTRIBUTIONS**

343 ZA conceived of the project and ZA and AW implemented the software. MH reviewed the  
344 software and offered helpful feedback. US and LJ tested the software and helped with the  
345 case studies. ZA and ESW wrote the initial drafts and final version. All authors  
346 participated in the writing of the manuscript, and read and approved the final manuscript.

## 347 **9 FUNDING**

348 This research was funded in part by National Science Foundation IOS 1546858 (to ESW)  
349 and by the Center for Metabolic Biology at Iowa State University (in partial support of ZA  
350 and MH).

## 351 **References**

- 352 [1] Worth, C. L., Gong, S., and Blundell, T. L. (2009) Structural and functional  
353 constraints in the evolution of protein families. *Nature Reviews Molecular Cell Biology*,  
354 **10**(10), 709.
- 355 [2] Swint-Kruse, L. (2016) Using evolution to guide protein engineering: the devil is in  
356 the details. *Biophysical journal*, **111**(1), 10–18.



- 357 [3] Jain, A., von Haeseler, A., and Ebersberger, I. (2018) The evolutionary traceability of  
358 proteins. *bioRxiv*,.
- 359 [4] Ruiz-Orera, J., Hernandez-Rodriguez, J., Chiva, C., Sabidó, E., Kondova, I., Bontrop,  
360 R., Marqués-Bonet, T., and Albà, M. M. (2015) Origins of de novo genes in human  
361 and chimpanzee. *PLoS genetics*, **11**(12), e1005721.
- 362 [5] Arendsee, Z. W., Li, L., and Wurtele, E. S. (2014) Coming of age: orphan genes in  
363 plants. *Trends in plant science*, **19**(11), 698–708.
- 364 [6] Tautz, D. and Domazet-Lošo, T. (2011) The evolutionary origin of orphan genes.  
365 *Nature Reviews Genetics*, **12**(10), 692–702.
- 366 [7] Rivera, M. C., Jain, R., Moore, J. E., and Lake, J. A. (1998) Genomic evidence for  
367 two functionally distinct gene classes. *Proceedings of the National Academy of*  
368 *Sciences*, **95**(11), 6239–6244.
- 369 [8] Wall, D., Fraser, H., and Hirsh, A. (2003) Detecting putative orthologs.  
370 *Bioinformatics*, **19**(13), 1710–1711.
- 371 [9] Ohno, S., Wolf, U., and Atkin, N. B. (1968) Evolution from fish to mammals by gene  
372 duplication. *Hereditas*, **59**(1), 169–187.
- 373 [10] Zhang, J. (2003) Evolution by gene duplication: an update. *Trends in ecology &*  
374 *evolution*, **18**(6), 292–298.
- 375 [11] Ghiurcuta, C. G. and Moret, B. M. (2014) Evaluating synteny for improved  
376 comparative studies. *Bioinformatics*, **30**(12), i9–i18.
- 377 [12] Tang, H., Bowers, J. E., Wang, X., Ming, R., Alam, M., and Paterson, A. H. (2008)  
378 Synteny and collinearity in plant genomes. *Science*, **320**(5875), 486–488.

- 379 [13] Cai, B., Yang, X., Tuskan, G. A., and Cheng, Z.-M. (2011) MicroSyn: a user friendly  
380 tool for detection of microsynteny in a gene family. *BMC bioinformatics*, **12**(1), 1.
- 381 [14] Knowles, D. G. and McLysaght, A. (2009) Recent de novo origin of human  
382 protein-coding genes. *Genome Research*, **19**(10), 1752–1759.
- 383 [15] Vakirlis, N. and McLysaght, A. Computational Prediction of De Novo Emerged  
384 Protein-Coding Genes pp. 63–81 Springer New York New York, NY (2019).
- 385 [16] Ng, M.-P., Vergara, I. A., Frech, C., Chen, Q., Zeng, X., Pei, J., and Chen, N. (2009)  
386 OrthoClusterDB: an online platform for synteny blocks. *BMC bioinformatics*, **10**(1),  
387 192.
- 388 [17] Cannon, S. B., Kozik, A., Chan, B., Michelmore, R., and Young, N. D. (2003)  
389 DiagHunter and GenoPix2D: programs for genomic comparisons, large-scale homology  
390 discovery and visualization. *Genome biology*, **4**(10), R68.
- 391 [18] Schwartz, S., Kent, W. J., Smit, A., Zhang, Z., Baertsch, R., Hardison, R. C.,  
392 Haussler, D., and Miller, W. (2003) Human–mouse alignments with BLASTZ. *Genome  
393 research*, **13**(1), 103–107.
- 394 [19] Marçais, G., Delcher, A. L., Phillippy, A. M., Coston, R., Salzberg, S. L., and Zimin,  
395 A. (2018) MUMmer4: A fast and versatile genome alignment system. *PLoS  
396 computational biology*, **14**(1), e1005944.
- 397 [20] Grabherr, M. G., Russell, P., Meyer, M., Mauceli, E., Alfoldi, J., Di Palma, F., and  
398 Lindblad-Toh, K. (May, 2010) Genome-wide synteny through highly sensitive sequence  
399 alignment: Satsuma. *Bioinformatics*, **26**(9), 1145–1151.
- 400 [21] Liu, D., Hunt, M., and Tsai, I. J. (2018) Inferring synteny between genome assemblies:  
401 a systematic evaluation. *BMC bioinformatics*, **19**(1), 26.

- 402 [22] Larkin, D. M., Pape, G., Donthu, R., Auvil, L., Welge, M., and Lewin, H. A. (2009)  
403 Breakpoint regions and homologous synteny blocks in chromosomes have different  
404 evolutionary histories. *Genome research*,.
- 405 [23] Murphy, W. J., Larkin, D. M., Everts-van der Wind, A., Bourque, G., Tesler, G.,  
406 Auvil, L., Beever, J. E., Chowdhary, B. P., Galibert, F., Gatzke, L., et al. (2005)  
407 Dynamics of mammalian chromosome evolution inferred from multispecies  
408 comparative maps. *Science*, **309**(5734), 613–617.
- 409 [24] Cannon, S. B. and Young, N. D. (2003) OrthoParaMap: distinguishing orthologs from  
410 paralogs by integrating comparative genome data and gene phylogenies. *BMC*  
411 *bioinformatics*, **4**(1), 35.
- 412 [25] Begun, D. J., Lindfors, H. A., Kern, A. D., and Jones, C. D. (2006) Evidence for de  
413 novo evolution of testis-expressed genes in the *Drosophila yakuba/Drosophila erecta*  
414 clade. *Genetics*, **176**(2), 1131–1137.
- 415 [26] Toll-Riera, M., Bosch, N., Bellora, N., Castelo, R., Armengol, L., Estivill, X., and  
416 Mar Alba, M. (2008) Origin of primate orphan genes: a comparative genomics  
417 approach. *Molecular biology and evolution*, **26**(3), 603–612.
- 418 [27] Donoghue, M. T., Keshavaiah, C., Swamidatta, S. H., and Spillane, C. (2011)  
419 Evolutionary origins of Brassicaceae specific genes in *Arabidopsis thaliana*. *BMC*  
420 *evolutionary biology*, **11**(1), 47.
- 421 [28] Langham, R. J., Walsh, J., Dunn, M., Ko, C., Goff, S. A., and Freeling, M. (2004)  
422 Genomic duplication, fractionation and the origin of regulatory novelty. *Genetics*,  
423 **166**(2), 935–945.
- 424 [29] Cui, L., Wall, P. K., Leebens-Mack, J. H., Lindsay, B. G., Soltis, D. E., Doyle, J. J.,  
425 Soltis, P. S., Carlson, J. E., Arumuganathan, K., Barakat, A., et al. (2006)

- 426 Widespread genome duplications throughout the history of flowering plants. *Genome*  
427 *research*, **16**(6), 738–749.
- 428 [30] Cormen, T. H., Leiserson, C. E., Rivest, R. L., and Stein, C. (2009) Introduction to  
429 algorithms, MIT press, .
- 430 [31] Mantovani, R. (1999) The molecular biology of the CCAAT-binding factor NF-Y.  
431 *Gene*, **239**(1), 15–27.
- 432 [32] Cicchillitti, L., Manni, I., Mancone, C., Regazzo, G., Spagnuolo, M., Alonzi, T.,  
433 Carlomosti, F., Lucia, M. D., Dell, G., Picardo, M., et al. (2017) The laminA/NF-Y  
434 protein complex reveals an unknown transcriptional mechanism on cell proliferation.  
435 *Oncotarget*, **8**(2), 2628.
- 436 [33] Benatti, P., Chiaramonte, M. L., Lorenzo, M., Hartley, J. A., Hochhauser, D.,  
437 Gnesutta, N., Mantovani, R., Imbriano, C., and Dolfini, D. (2016) NF-Y activates  
438 genes of metabolic pathways altered in cancer cells. *Oncotarget*, **7**(2), 1633.
- 439 [34] Li, G., Zhao, H., Wang, L., Wang, Y., Guo, X., and Xu, B. (2018) The animal nuclear  
440 factor Y: an enigmatic and important heterotrimeric transcription factor. *American*  
441 *journal of cancer research*, **8**(7), 1106.
- 442 [35] Nelson, D. E., Repetti, P. P., Adams, T. R., Creelman, R. A., Wu, J., Warner, D. C.,  
443 Anstrom, D. C., Bensen, R. J., Castiglioni, P. P., Donnarummo, M. G., et al. (2007)  
444 Plant nuclear factor Y (NF-Y) B subunits confer drought tolerance and lead to  
445 improved corn yields on water-limited acres. *Proceedings of the National Academy of*  
446 *Sciences*, **104**(42), 16450–16455.
- 447 [36] Qi, M., Zheng, W., Zhao, X., Hohenstein, J. D., Kandel, Y., O’Conner, S., Wang, Y.,  
448 Du, C., Nettleton, D., MacIntosh, G. C., et al. (2018) QQS orphan gene and its

- 449 interactor NF-YC 4 reduce susceptibility to pathogens and pests. *Plant biotechnology*  
450 *journal*,.
- 451 [37] Li, L. and Wurtele, E. S. (2015) The QQS orphan gene of Arabidopsis modulates  
452 carbon and nitrogen allocation in soybean. *Plant biotechnology journal*, **13**(2),  
453 177–187.
- 454 [38] Swain, S., Myers, Z. A., Siriwardana, C. L., and Holt, B. F. (2017) The multifaceted  
455 roles of NUCLEAR FACTOR-Y in Arabidopsis thaliana development and stress  
456 responses. *Biochimica et Biophysica Acta (BBA)-Gene Regulatory Mechanisms*,  
457 **1860**(5), 636–644.
- 458 [39] Gusmaroli, G., Tonelli, C., and Mantovani, R. (2002) Regulation of novel members of  
459 the Arabidopsis thaliana CCAAT-binding nuclear factor Y subunits. *Gene*, **283**(1),  
460 41–48.
- 461 [40] Lelandais-Briere, C., Moreau, J., Hartmann, C., and Crespi, M. (2016) Noncoding  
462 RNAs, emerging regulators in root endosymbioses. *Molecular Plant-Microbe*  
463 *Interactions*, **29**(3), 170–180.
- 464 [41] Combier, J.-P., Frugier, F., De Billy, F., Boualem, A., El-Yahyaoui, F., Moreau, S.,  
465 Vernié, T., Ott, T., Gamas, P., Crespi, M., et al. (2006) MtHAP2-1 is a key  
466 transcriptional regulator of symbiotic nodule development regulated by microRNA169  
467 in *Medicago truncatula*. *Genes & development*, **20**(22), 3084–3088.
- 468 [42] Tang, Y., Liu, X., Liu, X., Li, Y., Wu, K., and Hou, X. (2017) Arabidopsis NF-YCs  
469 mediate the light-controlled hypocotyl elongation via modulating histone acetylation.  
470 *Molecular plant*, **10**(2), 260–273.
- 471 [43] Fleming, J. D., Pavesi, G., Benatti, P., Imbriano, C., Mantovani, R., and Struhl, K.  
472 (2013) NF-Y co-associates with FOS at promoters, enhancers, repetitive elements, and

- 473 inactive chromatin regions, and is stereo-positioned with growth-controlling  
474 transcription factors.. *Genome research*, pp. gr-148080.
- 475 [44] Kumimoto, R. W., Zhang, Y., Siefers, N., and Holt III, B. F. (2010) NF-YC3,  
476 NF-YC4 and NF-YC9 are required for CONSTANS-mediated, photoperiod-dependent  
477 flowering in *Arabidopsis thaliana*. *The Plant Journal*, **63**(3), 379–391.
- 478 [45] Gnesutta, N., Kumimoto, R. W., Swain, S., Chiara, M., Siriwardana, C., Horner, D. S.,  
479 Holt, B. F., and Mantovani, R. (2017) CONSTANS imparts DNA sequence-specificity  
480 to the histone-fold NF-YB/NF-YC dimer. *The Plant Cell*, pp. tpc-00864.
- 481 [46] Huang, C.-H., Sun, R., Hu, Y., Zeng, L., Zhang, N., Cai, L., Zhang, Q., Koch, M. A.,  
482 Al-Shehbaz, I., Edger, P. P., et al. (2015) Resolution of Brassicaceae phylogeny using  
483 nuclear genes uncovers nested radiations and supports convergent morphological  
484 evolution. *Molecular biology and evolution*, **33**(2), 394–412.
- 485 [47] Berthelot, C., Brunet, F., Chalopin, D., Juanchich, A., Bernard, M., Noël, B., Bento,  
486 P., Da Silva, C., Labadie, K., Alberti, A., et al. (2014) The rainbow trout genome  
487 provides novel insights into evolution after whole-genome duplication in vertebrates.  
488 *Nature communications*, **5**, 3657.
- 489 [48] Byrne, K. P. and Wolfe, K. H. (2007) Consistent patterns of rate asymmetry and gene  
490 loss indicate widespread neofunctionalization of yeast genes after whole-genome  
491 duplication. *Genetics*, **175**(3), 1341–1350.
- 492 [49] Innan, H. and Kondrashov, F. (2010) The evolution of gene duplications: classifying  
493 and distinguishing between models. *Nature Reviews Genetics*, **11**(2), 97.
- 494 [50] Eddelbuettel, D., François, R., Allaire, J., Ushey, K., Kou, Q., Russel, N., Chambers,  
495 J., and Bates, D. (2011) Rcpp: Seamless R and C++ integration. *Journal of*  
496 *Statistical Software*, **40**(8), 1–18.

497 [51] Gentleman, R. C., Carey, V. J., Bates, D. M., Bolstad, B., Dettling, M., Dudoit, S.,  
498 Ellis, B., Gautier, L., Ge, Y., Gentry, J., et al. (2004) Bioconductor: open software  
499 development for computational biology and bioinformatics. *Genome biology*, **5**(10),  
500 R80.
